# Supplementary material
Source: PubMed Central journal article supplement (PMC3147908)
Supplement: supp_85_15_7948__1.pdf [file supp_85_15_7948__1.pdf]

HGyV - CGGCGCGCG CGGCAGC- - - - - AGCCTG TACACAGAGA CGTCGCTCGG GTCCTCCGGA 52  
 M55918 GAATTCCGAG TGGTTACTAT TCCATCACCA TTCTAGCCTG TACACAGAAA G- - - - TCAA GATGGACGAA 65  
 Consensus GNNNNNCGNG NGGNNNCTAT TCCATCACCA TTCTAGCCTG TACACAGANA NGTCGCTCNN GNNNNNCGNA  
 HGyV CCCTCGCTCC TCAACCTTTT CTTATTAATA TCATCACCCA GCGGACAAA CGCCACAAGG CGTGGTAACC 122  
 M55918 TCGCTCGACT TCGCTCGCGA TTCGTGCAAG GCG- - - - - GGGGGCCGGA GGCCCC- - - - CGGTGGCC 123  
 Consensus NCNNNNNNCN TCNNNCCNNN NTNNTNNAAN NCNTCACCCA GNGNGNCNNA NGCCNCNAGG CGNGGTNNCC  
 HGyV AACGATATGT AAGTAAACTG AAGACTCATAC CGGTACAGGG GGGTACGTCA CCATGTACAG GGGGGTACGT 192  
 M55918 CCCCTCCAAC GAGTGG- - - - - ACGTACAGGG GGGTACGTCA TC- CGTACAG GGGGGTACGT 181  
 Consensus NNCNNNNNNN NAGTNNACTG AAGACTCATNC NNGTACAGGG GGGTACGTCA NCANGTACAG GGGGGTACGT  
 HGyV CACCATGTAC AGGGGGGTAC GTCATCATGT ACAGGGGGGT ACGTACCAT GTACAGGGGG GTACGTACCC 262  
 M55918 CATC- CGTAC AGGGGGGTAC GTCA- - - - - CAAAGAGGC GTTCC- - - - C GTACAGGGGG GTACGTAC- 238  
 Consensus CANGANGTAC AGGGGGGTAC GTCATCATGT ACANNNGGN NNNNCACCAN GTACAGGGGG GTACGTACCC  
 HGyV ATGTACAGGG GGGTACGTCA CAGCCAATCA GAATTGAGCA CGCC- CAGGA ACGCCCTGG GCGGGGAGAT 331  
 M55918 GCGTACAGGG GGGTACGTCA CAGCCAATCA AAAGCTGCCA CGTTGCGAAA GTGACGTTTC GAAAATGGGC 308  
 Consensus NNGTACAGGG GGGTACGTCA CAGCCAATCA NAANNNNCA CGNNGCENNA NNGNCNNTNN GNNNNNNGN  
 VP2  
 HGyV GCTATCAATT TAGGGATATA AGCAGAGCAC ATACCGGACG GCGGTAGGTA TGTCATCCGG CGGTCTCGGG 401  
 M55918 GCGCAAGCC TCTCTATATA TTGAGCGCAC ATACCGGTCG GCAGTAGGTA TA- CGCAAGG CGGTCCGGGT 377  
 Consensus GNNNNANNN TNNNATATA NNNAGNGCAC ATACCGGNCG GCNGTAGGTA TNCNNNGG CGGTCCNNGG  
 VP2  
 HGyV GATTGCA- - G CGCCTGTGAG AACCAGGCGG CTGGGGGCG TGAATTGCCG CTTAGGCAAG AGGGGCAACT 469  
 M55918 GGATGCACGG GAACGGCGGA CAACCGGCGG CTGGGGGCG TGAATCGGCG CTTAGCCGAG AGGGGCAACC 447  
 Consensus GNNTGCACGG NNNCNGNGNN NANCNGGCGG CTGGGGGCG TGAATNGNCG CTTAGNCNAG AGGGGCAACN  
 VP2 Apoptin  
 HGyV TGGGCCCAGC GGAGCCGGAT CCACGGGCAA GACACTAAAT GCAGACCCCC CGCTCTCGCC GACGAGCAAC 539  
 M55918 TGGGCCCAGC GGAGCCGG- - CAGGGGCAA GTAATTCAA ATGAAC- - - - GCTCTCAA GAAGA- - - - 505  
 Consensus TGGGCCCAGC GGAGCCGNNT CCANGGCAA GNNANTNNAN NNNNACCCCC CGCTCTCNNN GANGAGCAAC  
 VP2 Apoptin  
 HGyV AACTACTCAG TCAGAACTAT TAACGGCATA CGAGCATCCA ACAAGTTCGT CTCCGCCAGC AGAAACGACC 609  
 M55918 - - - TACTCCA CCCGGACCAT CAACGGTGT CAGGCCACCA ACAAGTTCAC GGCCGTTGGA AACCCCTCAC 572  
 Consensus AACTACTCNN NCNGNACNAT NAACGGNTN CNNGCNCNA ACAAGTTCNN NNCCGNNNGN ANNNCCNNN  
 VP2 Apoptin  
 HGyV TCGATAGAGA TCCAAATTGG TATCGGGTCA ACTATAATTA CTCTATCGCT ACCTGGCTAC GCCAGTGTGC 679  
 M55918 TGCAGAGAGA TCCGGATTGG TATCGGTGGA ATTACAATCA CTCTATCGCT GTGTGGCTGC GCGAATGCTC 642  
 Consensus TNNANAGAGA TCCNATTGG TATCGNNNA ANTANAATNA CTCTATCGCT NNNTGGCTNC GCNANTGNCC

**VP2**  
**Apoptin**

HGyV CCGTTCTCAC GACGAGATCT GCACCTGCGG ACGATGGAGG AGTCACTGGT TCCAGGAGGC TAGTGGACTT 749  
 M55918 GCGCTCCAC GCTAAGATCT GCAACTGCGG ACAATTCAGA AAGCACTGGT TTCAAGAATG TGCCGGACTT 712  
 Consensus GCGNTCNAC GNNNAGATCT GCANCTGCGG ACNATNNAGN ANNCACTGGT TNCANGANNN TNNNGGACTT

**VP2**  
**Apoptin**

HGyV GTCACACAGG AGACCCAGAC GGACCAGCTC GCCAGAGATC TACGTCGGCT TCGCGG- - CA AAGGAGAAGC 817  
 M55918 GAGGACCGAT CAACCCAAGC - - - CTCCTC GAAGAAGCGA TCCTGCGACC CCTCCGAGTA CAGGGTAAGC 779  
 Consensus GNNNNNCNNN NNACCCANN C GACNNNCTC GNNNNAGNN TNCNNCGNCN NCNCCGAGNA NAGGNNAAAGC

**VP2**  
**Apoptin**

HGyV - AGCAAAAAG AAAACTTGAT TACCTTAAGG GAAAACGGAC CCC- - - CTAT AAAAAAGC- - - TAAGACTGT 880  
 M55918 GAGCTAAAAG AAAGCTTGAT TACCACTACT CCCAGCCGAC CCCGAACCGC AAAAAGGCGT ATAAGACTGT 849  
 Consensus GAGCNAAAAAG AAANCTTGAT TACCNNNANN NNNANCGAC CCCGAACNNN AAAAANGCGT ATAAGACTGT

**VP2**  
**Apoptin**  
**VP1**

HGyV AACATGGCAA GACTACGAAG AAGACGACCT CGCGGACGCT TTGGCTTCTA CCACAGAGGA CGATGGCACT 950  
 M55918 AAGATGGCAA GAC- - - GAGC TCGCAGACCG AGAGGCCGAT TTTACTCCTT CAGAAGAGGA CGGTGGCACC 916  
 Consensus AANATGGCAA GACTACGANN NNGNNGACCN NGNGGNCNT TTNCTNCTN CNNAGAGGA CGNTGGCACN

**VP2**  
**VP1**

HGyV GGAGACACAG ACTGCGACGA AGACGCTATT CCCGGAGGGG TAAATTTCTA TATGCGCGTA GAAGATCCTT 1020  
 M55918 ACCTCAAGCG ACTTCGACGA AGATA- - - - - TAAATTTCTA CATCGGAGGA GACAGCGGTA 971  
 Consensus NNNNNNANNG ACTNCGACGA AGANNCTATT CCCGGAGGGG TAAATTTCTA NATNNGNGNA GANNNNNTN

**VP2**  
**VP1**

HGyV TGATCGCCGC GTTAAGAGGA GGATCTT- - - CAACCCACAC CCGGCTCCT ATGTGGTAAG GCTACCGAAC 1087  
 M55918 TCGTAGACGA GCTTTTAGGA AGGCCTTTCA CAACCCCGC CCCGGTACGT ATAGTGTGAG GCTGCCGAAC 1041  
 Consensus TNNTNGNCGN GNTNNNAGGA NGNCTTTCA CAACCCNCC CNNGGNCNT ATNNGTNAG GCTNCCGAAC

**VP1**

HGyV CCTTACAATA AGCTTACCCT CTTTTTCCAA GGCATTGTAT TCATTCCGGA GGCTCAAGCT TTTGTTAAAA 1157  
 M55918 CCCCAATCTA CTATGACTAT CCGCTTCCAA GGGGTCATCT TTCTCACGGA AGGACTCATT CTGCCTAAAA 1111  
 Consensus CCNNANNNTA NNNTNACNNT CNNTTCCAA GGNTNTNT TNNTNCCGGA NGNCCNNNT NTNNNTAAAA

**VP1**

HGyV GCACCTA- - - - - - - - TAA AAAGACTAAC CTTACGGTTT GCCATGTAGC CTCCATAAAT GTTAACCTCC 1217  
 M55918 ACAGCACAGC GGGGGGCTAT GCAGACCACA TGTACGGGGC GAGA- GTCGC CAAGATCTCT GTGAACCTGA 1180  
 Consensus NCANCNAGC GGGGGGCTAN NNAGACNANN NNTACGGNNN GNNATGTNGC CNNNATNNNT GTNAACCTNN

**VP1**

HGyV GAGAATTTAT GCTTGCAACA ATGCCTTTAG ATGCAAAGAG CAAAATCGGA GGCCCTAACC CTTATCCTCA 1287  
 M55918 AAGAGTTCTT GCTAGCTCA ATGAACCTGA CATACGTGAG CAAAATCGGA GGCCCATCG CCGGTGAGTT 1250  
 Consensus NAGANTTNTT GCTNGCNCA ATGNNNTNN NNNNNNGAG CAAAATCGGA GGCCCNANCN CNNTNNNNN

VP1  
 HGyV 1 340 1 360 1 380 1 400  
 GCACCTTGCA GGGTGCCAAT GGTCAGCACA AACGACGCAG GAC - - GCATG GCCGTACGCA GCGGGCATGT 1355

M55918 GATTGCGGAC GGGTCTAAAT - - - - - CACA AGCCGCGGAC AATTGGCCTA ATTGCTGGCT GC - - - - CGC 1309  
 Consensus GNNNNNGNAN GGGTNNNAAT GGTCAGCACA ANCNCCGNAN NANTGGCNTN NNNGNNNGCN GCGGGCANGN

VP1  
 HGyV 1 420 1 440 1 460  
 CAGAAACAAA AAGACCCAGC GTACCACCGA GTGAGTGGTG GCGCTGGGCT CTCCTGGTGA TGCACCCTAG 1425

M55918 TAGATAATAA CGTGCCCTCC GCTACACCAT CGGCATGGTG GAGATGGGCC TTAATGATGA TGCAGCCAC 1379  
 Consensus NAGANANNA NNNNCCNNC GNNNCACNN NNGNNTGGTG GNGTGGGCN NTNNTGNTGA TGCANCCNAN

VP1  
 HGyV 1 480 1 500 1 520 1 540  
 AGCACCTGGC AGATTTTACA ATGCCCAAAA GCTAATGACT CTGGACGCTA TGGGAGACCT GTTAGGGGGC 1495

M55918 GGACTCTTGC CGGTTCTTTA ATCACC AAA GCAGATGACC CTGCAAGACA TGGGTCGCAT GTTTGGGGGC 1449  
 Consensus NGNNNCTNGC NGNTTNTNNA ATNNCCAAA GCNNATGACN CTGNANGNNA TGGGNNNCNT GTTNGGGGGC

VP1  
 HGyV 1 560 1 580 1 600  
 TGGCAGCTAT TCAGGCATGT AAAAACCAAG TTCAGAGTGC TAGCGACTAT GGGACAAGGG GCTTTCTCAC 1565

M55918 TGGCACCTGT TCCGACACAT TGAACCCGC TTTCAGCTCC TTGCCACTAA GAATGAGGGA TCCTTCAGCC 1519  
 Consensus TGGCANCTNT TCNGCANNT NAAACCNNT TTNNNNNTNC TNGCNACTAN GNNNNANGGN NCNTTCNNNC

VP1  
 HGyV 1 620 1 640 1 660 1 680  
 CAGTTGCAAG CCTACTTGTA CAAAATGACT ACTGGAGCAG GAGGCACTTA GAGGGCTTCC CAGTTAAAGG 1635

M55918 CCGTGGCGAG TCTTCTCTCC CAGGGAGAGT ACCTCA - - - - - CGCGTC GGGACGATGT TAAGTACAG- 1580  
 Consensus CNGTNGCNAG NCTNCTNNNN CANNNGANT ACNNNAGCAG GAGGCNCNTN GNGNNNTNN NANNTANAGG

VP1  
 HGyV 1 700 1 720 1 740  
 TGCACCACCT ATGTGCACCA TGCAAAGAAA AACTCAGCAG TACGGCAACG TGGAGTCCAA TGCACCGGCA 1705

M55918 - - CAGCGATC ACCAGAACCG - GTGGCAAAA AGCGGACAAA C - CGATGACG GGGG - - CAT TGCTTATGCG 1644  
 Consensus TGCANCNNN ANNGNACCN TGNNNNNAAA ANNNNNNCAN NACGNNNACG NGGNGTCCAN TGCNNNGCN

VP1  
 HGyV 1 760 1 780 1 800 1 820  
 GATGAGCAAT GGCTACCCGT AAATCCCCCA GACCCACCA GGTACCCAAA CCAGGGAGGA TGCTCCCAA 1775

M55918 ACCGGGAAAA TGAGACCCGA CGAGCAACAG TACCCTGCTA TGCCCCAGA CCCCCGATC ATCACCGCTA 1714  
 Consensus NNNNGNAAAN NGNNACCCGN NNANCNCNN NACCCNCNN TGNNCCANA CCNNNNNNN NNCNCNNNA

VP1  
 HGyV 1 840 1 860 1 880  
 ACGTGGCTCC AGGCATATAC CGGCTTGCA GCTTAGAAGA CAGCAGCAGA TGCTTTTATT CAAAGGCTTG 1845

M55918 CTACAGCGCA AGGCACGCAA - - - - - GTCC GCTGCATGAA TAGCACGCAA GCTTGGTGGT CATGGGACAC 1778  
 Consensus NNNNGCNCN AGGCANNAN CGGCTTGNNT GCTNNNNNA NAGCANNNA NNNTNTNTT CANNGGNNN

VP1  
 HGyV 1 900 1 920 1 940 1 960  
 TTTCCCAAGC TTTGCAGCGC TTTCTGCTAT GGGTGCACC TGGTCAATTC CTAGCACTCA AAAACCTATT 1915

M55918 ATATATGAGC TTTGCAACAC TCACAGCACT CGGTGCACAA TGGTCTTTTC CTCCAGGGCA ACGTTCAAGT 1848  
 Consensus NTNNNNNAGC TTTGCANCNC TNNCNGCNT NGGTGCACNN TGGTCNTTC CTNNNNNCA ANNNNCNNT

VP1  
 HGyV 1 980 2 000 2 020  
 CAAAGAGGCT CATTTAACAA GCACTCCATC ACGGGGACAG GGGACCCCA GGGCCGACGG TGGTTAACAC 1985

M55918 TCTAGACGGT CCTTCAACCA CCACAAGGCG AGAGGAGCCG GGGACCCCA GGGCCAGAGA TGGCACACGC 1918  
 Consensus NNNAGANGNT CNTTNACNA NCACNNNNN ANNGGNCNG GGGACCCNA GGGCCNNGN TGGNNACNC

VP1  
 HGyV 2 040 2 060 2 080 2 100  
 TTGTGCCTAA AGGAGTCGAG TGGATTACTG ACGACACCAT G - - - GAACCT ACGC - - - AAC TGGACACAGA 2049

M55918 TGGTGCCGCT CGGCACGGAG ACCATACCG ACAGCTACAT GTCAGCACCC GCATCAGAGC TGGACACTAA 1988  
 Consensus TNGTGCCNN NGGNNNGAG NNNATNACNG ACNNCNCAT GTCAGNACCN NCNACAGAN TGGACACNNA

**VP1**  
  
 HGyV **CATTGCAACA CTCTTCTTGG CTCAAGGCAG TCCAGTATGG GCACCCCTACA AATTCGGAAC TTTTCACAAA** 2119  
 M55918 **TTTCTTTACG CTTTACGTAG CGCAAGGCAC AAATAAGTCG CAACAGTACA AGTTCGGCAC AGCTACATAC** 2058  
 Consensus **NNTNNNNACN CTNTNCNTNG CNCAAGGCAN NNNNNNTNG NNCNNTACA ANTTCGGNAC NNNTNNNNAN**

**VP1**  
  
 HGyV **GCGATGGCGC TAACAGCGAT GCAGACCACC CCTTGGTGCG TGGTGAAAGT CCGTTCCATC TGGCAGCTCG** 2189  
 M55918 **GCGCTAAAGG AGCCGGTAAT GAAGAGCGAT GCATGGGCAG TGGTACGCGT CCAGTCGGTC TGGCAGCTGG** 2128  
 Consensus **GCGNTNNNGN NNNCNGNNAT GNAGANCNNN NCNTGGNNNG TGGTNNNNGT CCNNTCNNTC TGGCAGCTNG**

**VP1**  
  
 HGyV **GCAACCAAAG ACAGCCGTAC CCATGGCAAG TGAAGTGGTA CAACGAGCAC ACTGCAACGG ACAGATACAA** 2259  
 M55918 **GTAACAGGCA GAGGCCATAC CCATGGGACG TCAACTGGGC GAAC- AGCAC CATGTACTGG G- GGACGCAG** 2196  
 Consensus **GNAACNNNNN NNNGCCNTAC CCATGGNANG TNAACTGGNN NAACGAGCAC NNTGNANNGG NCNGANNAN**

**VP1**  
  
 HGyV **CCC-----GC** 2264  
 M55918 **CCCTGAAAAG GGGGGGGGGC TAAAGCCCC CCCCTTAAA CCCCCCCTG GGGGGGATTC CCCCCAGAC** 2266  
 Consensus **CCCTGAAAAG GGGGGGGGGC TAAAGCCCC CCCCTTAAA CCCCCCCTG GGGGGGATTC CCCCCAGNC**

**VP1**  
  
 HGyV **CCCCCGTCAA TAAATAATTA AATAAAC- - - AAATCGAA TTATTTATTT ATTTT** 2315  
 M55918 **CCCCCCTTTA TATAGCACTC AATAAACGCA GAAAATAGAT TTATCGCACT ATC- -** 2319  
 Consensus **CCCCNTNNA TANANNANTN AATAAACNCA GAAAATNGAN TTATNNNNNT ATNTT**
