# Supplementary material
Source: PubMed Central journal article supplement (PMC3147908)
Supplement: supp_85_15_7948__2.pdf [file supp_85_15_7948__2.pdf]

Table1 : Primers used to sequence the HGyV genome by the Sanger method

| Forward                     | Reverse                     | Size (bp) |
|-----------------------------|-----------------------------|-----------|
| 5'-TCCGTTGCAGTGTGCTCGTTG-3' | 5'-GCACTTAGAGGGCTTCCCAG-3'  | 642       |
| 5'-CTCATCTGCCGGTGCATTGG-3'  | 5'-CCGGGCTCCTATGTGGTAAG-3'  | 654       |
| 5'-AAAGCTTGAGCCTCCGGAATG-3' | 5'-TAGGCAAGAGGGGCAACTTGG-3' | 698       |
| 5'-TAGTTGTTGCTCGTCGGCGAG-3' | 5'-CTTTCACCACGCACCAAGGG-3'  | 711       |

Table 2: Description of the Open Reading frames of HGyV and comparison with those of CAV (Emboss, Align Needle).

| Protein | putative open reading frame (s) | frame | No of amino acids | theoretical mass kDa | CAV aa % identity | CAV nuc % identity |
|---------|---------------------------------|-------|-------------------|----------------------|-------------------|--------------------|
| VP1     | 884-2281                        | +2    | 465               | 53.58                | 43.6              | 53.1               |
| VP2     | 381-1076                        | +3    | 231               | 25.5                 | 44.8              | 60.1               |
| apoptin | 508-882                         | +1    | 124               | 13.63                | 31.1              | 60.9               |

Table 3: Primers for the nested PCR used for prevalence studies

|                  | Forward                     | Reverse                     | Size (bp) |
|------------------|-----------------------------|-----------------------------|-----------|
| External primers | 5'-CAAAATCGGAGGCCCTAACCC-3' | 5'-ATGCCTGAATAGCTGCCAGCC-3' | 256       |
| Internal primers | 5'-GTCAGCACAAACGACGCAGG-3'  | 5'-AGGGTGCATCACCAGGAGAG-3'  | 115       |
